# Supplementary material for: The role of Information and Consent Formin patients’ decision-making and understanding in oncology clinical trials: a mixed-methods study
Source: Research Square preprint supplement (doi:10.21203/rs.3.rs-7948212/v1), 2025-11-25
Supplement: Supplementary file 1 [file 41252136dc8a9dba1a398d6e.docx]

**Interview guide for healthcare providers (nurses, nurse managers, nursing assistants)**

**Demographics**
Gender, age, years of experience in Clinical Research, profession

**You and your feelings about clinical research**

- Can you tell me what you think about clinical research? What does it represent for you?
- Are you in this department by choice? If yes, why?

**You take care of patients enrolled in clinical research**

- Do you think it is an opportunity for them to participate in a clinical trial?
- Do you think they all benefit from it?
- Why do you think they agreed to participate in a trial?
- Do you think they are free in their decision?
- What is your opinion about them?

**Your feelings about the information provided to patients**

- Do you think patients are well informed?
- Do you think they understood the information well?
- Do you think they are fully aware / well-informed (enlightened)?
- Do they ask you questions? Which ones come up most often?
- Are they concerned about data protection? About genetic analyses? Optional biopsies?
- In your opinion, are there things that could be improved in the information provided to them?
- Do you think it is more comfortable (less stressful) not to tell them everything?
- How do you see the role of the accompanying person?
- What do you think about the placebo group? Are patients afraid of being assigned to it?
