# Supplementary material for: The role of Information and Consent Formin patients’ decision-making and understanding in oncology clinical trials: a mixed-methods study
Source: Research Square preprint supplement (doi:10.21203/rs.3.rs-7948212/v1), 2025-11-25
Supplement: Supplementary file 2 [file 54e4c1af2e94c04d40e1fe18.docx]

**Interview guide for patients**

During the consultation in which your doctor offered you participation in a clinical trial, you received several pieces of information to help you decide. Your doctor, who knows your medical situation, explained the trial and why he/she believed it could benefit you. He/she also provided an information sheet (PICF) containing all details of the trial: rationale, schedule, expected effects of the treatment, and data protection measures.

To improve this information sheet, we would like to ask you a few questions.

1. **Is this the first time you have agreed to participate in a clinical trial?**
   Was the initiative yours or was it proposed to you?
2. **Did you read the information sheet?**
   - Completely, partially, or not at all?
   - When did you read it? Before deciding? After deciding?
   - Did one of your relatives read it as well?
3. **Why did you read or not read it?**
   - Need for information before deciding? Complementary information to the doctor’s explanations? Curiosity? Scientific or medical interest?
   - To be sure you follow all instructions?
   - If you did not read it: trust in the doctor? No desire to know beforehand? Fear of stressful information? Too long or complicated? Lack of interest? Other reasons?
4. **Would you have appreciated having a short summary?**
5. **What role did the written information play in your decision?**
   - Did you change your mind after reading it? (reassured or worried)
   - Which sections were most useful to you?
   - Would you have liked more time to discuss the information? With whom?
   - How long was there between receiving the information and making your decision?
6. **Did you discuss your participation with relatives or family?**
   - Did someone else read the information sheet meant for you?
   - Did their opinion influence your decision?
   - Did they encourage you or warn you about anything?
7. **What were your reasons for agreeing?**
   - Sense of responsibility toward future patients? Altruism? Optimism?
   - How do you feel about participating since your inclusion?
   - Do you feel psychological or physical benefits?
8. **How would you describe your relationship with the healthcare team (before and since inclusion)?**
   - Has it changed since joining the study?
   - Relationship of trust? Emotional support? Shared goal?
   - With whom do you feel most comfortable communicating (oncologist, nurses, healthcare assistants…)?
9. **How was the clinical trial presented to you?**
   - As an option that you could refuse?
   - Were alternative treatments explained?
   - As the option with the greatest benefits?
   - As an innovative or new treatment?
10. **Do you know whether your doctor benefits from your participation?**

- Sense of duty? Career benefits? Scientific recognition? Financial advantages? Competition between clinical trials?
- Responsibility and normalization of risk-taking in medicine?
