# Supplementary material for: The role of Information and Consent Formin patients’ decision-making and understanding in oncology clinical trials: a mixed-methods study
Source: Research Square preprint supplement (doi:10.21203/rs.3.rs-7948212/v1), 2025-11-25
Supplement: Supplementary file 3 [file 587cccfca15374d9927d827b.docx]

**Interview Guide for Investigating Physicians**

**Administrative information**

- Gender, age, years of experience in clinical research, medical specialty
- Do you enroll patients in early-phase trials? Phase III trials?
- Approximately how many patients per month?

**General questions**

**How do you choose the clinical trials in which you enroll patients?**

- Word of mouth or conferences
- Mechanism of action of the investigational drug
- Encouragement from colleagues
- Recruitment by trial sponsors

**Do you prefer to enroll patients in early-phase trials or phase III trials, and why?**

**Have you heard of trials in which you would have really wanted to include patients?
Or, on the contrary, trials in which you really would not have wanted to include patients?**

**Have you ever enrolled a patient “reluctantly” — for example, because they insisted strongly, or simply to help close a trial?**

**Do you consider it an opportunity for a patient to participate in a clinical trial?
In early-phase trials or in later-phase trials?**

**In your opinion, what percentage of patients actually benefit from taking part in a clinical trial?
Does this differ for early-phase trials?**

**Do you believe that the control group in phase II or III trials is always necessary?**

**Regarding the Patient Information and Consent Form (PICF / NICE)**

- Do you read every information sheet before presenting it to patients? Completely?
- Have you participated in writing any of them?
- What do you think about them (length, clarity, etc.)?

**To what extent do you feel the written information influences patient decision-making?**

**Do you have patients who sign without reading it?**

**Do you feel that your own enthusiasm influences the patient’s decision?**

**Do you have difficulty convincing patients to accept:**

- Optional biopsies?
- Research on their biological samples?
- Genetic analyses?

**Do they seem concerned about data protection and privacy?**
